# Supplementary material for: Transcriptomic and barrier responses of human airway epithelial cells exposed to cannabis smoke
Source: PubMed Central journal article supplement (PMC6811686; doi:10.14814/phy2.14249), 2019-10-23
Supplement: PHY2-7-e14249-s001.pdf [file PHY2-7-e14249-s001.pdf]

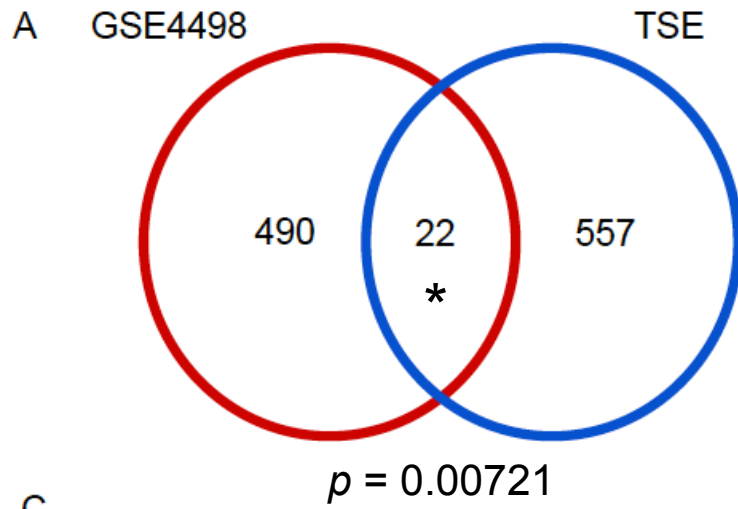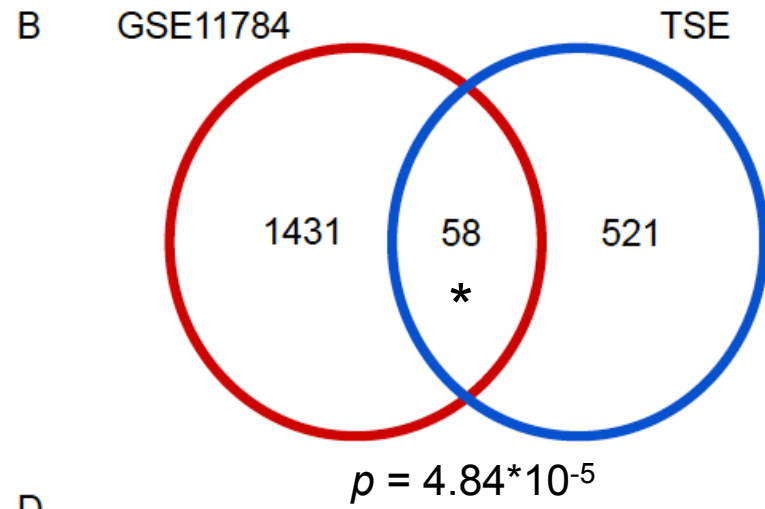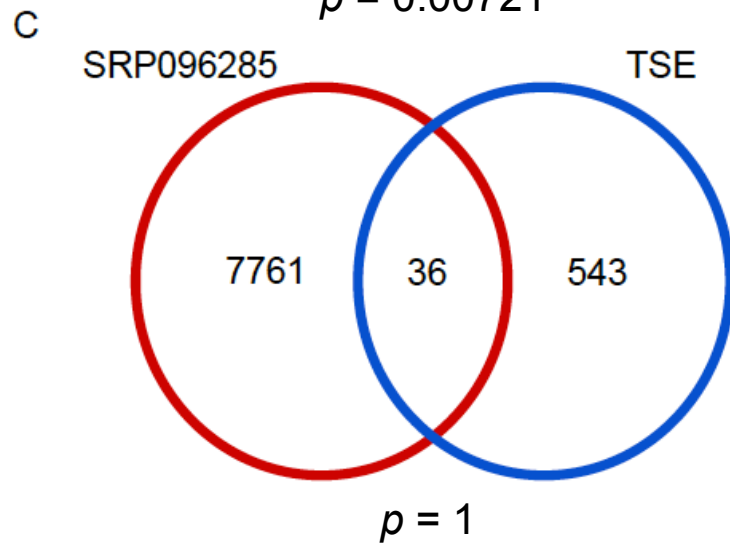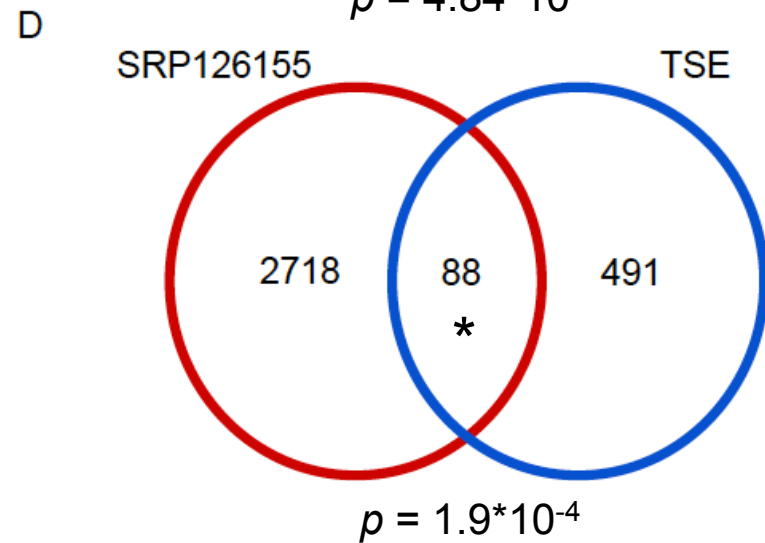

**Supplement Figure 1:** Union of differentially expressed genes between our tobacco smoke exposure experiment in Calu-3 cells and the genes differentially expressed in GSE4498, GSE11784, SRP096285, and SRP126155 calculated with a hypergeometric test in R.
